# Supplementary material for: Correlation of Cytochrome P450 Oxidoreductase Expression with the Expression of 10 Isoforms of Cytochrome P450 in Human Liver
Source: PubMed Central journal article supplement — Drug Metab Dispos. 2016 Aug;44(8):1193–200. doi: 10.1124/dmd.116.069849 (PMC4986620; doi:10.1124/dmd.116.069849), 2016-08
Supplement: supp_116.069849_Supplementary_69849.pdf [file supp_116.069849_Supplementary_69849.pdf]

## **Supplemental Data**

### **Journal Title**

Drug Metabolism and Disposition

### **Article Title**

**Correlation of cytochrome P450 oxidoreductase expression with the expression of 10 isoforms of cytochrome P450 in human liver**

Hai-Feng Zhang, Zhi-Hui Li, Jia-Yu Liu, Ting-Ting Liu, Ping Wang, Yan Fang, Jun Zhou, Ming-Zhu Cui, Na Gao, Xin Tian, Jie Gao, Qiang Wen, Lin-Jing Jia, Hai-Ling Qiao\*

Institute of Clinical Pharmacology, Zhengzhou University, Zhengzhou, People's Republic of China

## Supplemental Table

### Supplementary Table 1

#### Donor characteristics of human liver samples and POR data in donor subgroups

| Variables            | Group                            | N   | POR (Median)             |           |                           |
|----------------------|----------------------------------|-----|--------------------------|-----------|---------------------------|
|                      |                                  |     | Protein<br>(pmol/mg) (N) | mRNA (N)  | Activity<br>(nmol/min/mg) |
| Gender               | Male                             | 40  | 76.23 (36)               | 0.27 (36) | 50.99                     |
|                      | Female                           | 85  | 67.65 (64)               | 0.28 (71) | 56.49                     |
| Age (years)          | 20-45                            | 49  | 73.50 (36)               | 0.28 (45) | 61.25                     |
|                      | 46-60                            | 62  | 60.55 (52)               | 0.28 (51) | 52.03                     |
|                      | 61-75                            | 14  | 93.44 (12)               | 0.22 (11) | 65.56                     |
| Smoking              | Non-smoking                      | 112 | 71.72 (87)               | 0.29 (94) | 56.57                     |
|                      | smoking                          | 13  | 52.40 (13)               | 0.26 (13) | 46.53*                    |
| Drinking             | Non-drinking                     | 112 | 70.90 (88)               | 0.29 (94) | 57.01                     |
|                      | drinking                         | 13  | 50.35 (12)               | 0.26 (13) | 44.45 <sup>s</sup>        |
| Medical<br>Diagnosis | cavernous<br>hemangioma of liver | 90  | 56.26 (69)               | 0.28 (76) | 53.44                     |
|                      | cholelithiasis                   | 9   | 72.35 (9)                | 0.32 (9)  | 56.05                     |
|                      | gallbladder cancer               | 5   | 85.34 (4)                | 0.28 (4)  | 43.41                     |
|                      | hepatocellular<br>carcinoma      | 4   | 58.03 (4)                | 0.23 (4)  | 62.07                     |
|                      | hepatic<br>cholangiocarcinoma    | 7   | 86.90 (6)                | 0.23 (6)  | 68.09                     |
|                      | metastatic carcinoma             | 10  | 88.44 (8)                | 0.15(8)   | 61.99                     |

For POR protein and mRNA, the number of liver samples was 100 and 107, respectively. \* $P < 0.05$  VS nonsmoking; <sup>s</sup>  $P < 0.05$  VS non-drinking.
